# Supplementary material for: Nutrition after preterm birth and adult neurocognitive outcomes
Source: PubMed Central journal article supplement (PMC5619810; doi:10.1371/journal.pone.0185632), 2017-09-28
Supplement: pone.0185632.s002.pdf [file pone.0185632.s002.pdf]

**S2 Table. Intake of carbohydrates, protein, and fats from birth to 3 weeks, 3 to 6 weeks, and 6 to 9 weeks of age, and IQ, VIQ, and PIQ in young adulthood, in individuals born with very low birth weight (<1500g).<sup>a</sup>**

|                      | <i>IQ</i>          |                            | <i>VIQ</i>         |                            | <i>PIQ</i>         |                           |
|----------------------|--------------------|----------------------------|--------------------|----------------------------|--------------------|---------------------------|
|                      | <i>Effect size</i> | <i>(95% CI)</i>            | <i>Effect size</i> | <i>(95% CI)</i>            | <i>Effect size</i> | <i>(95% CI)</i>           |
| <b>Carbohydrates</b> |                    |                            |                    |                            |                    |                           |
| Birth to 3 weeks     | -0.01              | (-0.16, 0.15)              | -0.10              | (-0.25, 0.05)              | 0.07               | (-0.09, 0.23)             |
| 3-6 weeks            | 0.18               | (0.02, 0.35)               | 0.18               | (0.01, 0.34) <sup>b</sup>  | 0.14               | (-0.04, 0.31)             |
| 6-9 weeks            | 0.08               | (-0.09, 0.25)              | 0.11               | (-0.05, 0.28)              | 0.04               | (-0.14, 0.22)             |
| <b>Protein</b>       |                    |                            |                    |                            |                    |                           |
| Birth to 3 weeks     | 0.33               | (-0.22, 0.87)              | -0.20              | (-0.74, 0.34)              | 0.73               | (0.18, 1.29) <sup>b</sup> |
| 3-6 weeks            | 0.39               | (-0.11, 0.90)              | 0.19               | (-0.30, 0.69)              | 0.47               | (-0.06, 1.00)             |
| 6-9 weeks            | -0.13              | (-0.59, 0.33)              | -0.26              | (-0.70, 0.19)              | -0.04              | (-0.52, 0.44)             |
| <b>Fats</b>          |                    |                            |                    |                            |                    |                           |
| Birth to 3 weeks     | 0.16               | (-0.02, 0.34)              | 0.03               | (-0.15, 0.21)              | 0.25               | (0.07, 0.44) <sup>b</sup> |
| 3-6 weeks            | 0.34               | (0.14, 0.54) <sup>bc</sup> | 0.25               | (0.05, 0.45) <sup>bc</sup> | 0.35               | (0.14, 0.56) <sup>b</sup> |
| 6-9 weeks            | 0.14               | (-0.09, 0.36)              | 0.13               | (-0.09, 0.35)              | 0.11               | (-0.13, 0.35)             |

In all analyses, we adjusted for gestational age, sex, birth weight standard deviation score, and age at follow-up (Model 1).

<sup>a</sup> The number of participants in each analysis varied according to data availability. At 0-3 weeks, 86 participants; at 3-6 weeks, 82 participants; and at 6-9 weeks, 79 participants had data available on carbohydrate, protein, and fat intakes and were included in the analyses (Model 1-2). In Model 3, we had to further exclude two people because of missing data on neonatal complications.

<sup>b</sup> p-value <0.05 in Model II (adjusted for Model I factors, parental education, maternal smoking during pregnancy, and preeclampsia).

<sup>c</sup> p-value <0.05 in Model III (when adjusting for Model I factors and neonatal complications, including septicemia, bronchopulmonary dysplasia, patent ductus arteriosus, blood exchange transfusion, duration of ventilator treatment, and intraventricular hemorrhage).

Abbreviations: Carbohydrates: mean carbohydrate intake, g/kg/day; CI: Confidence interval; Effect size: change in IQ, VIQ, or PIQ, in standard deviation units, for each g/kg/day increase in carbohydrate, protein, and fat intake; Fats: mean fat intake, g/kg/day; g: gram; kcal: kilocalories; IQ: full-scale intelligence quotient; PIQ: performance intelligence quotient; Protein: mean protein intake, g/kg/day; VIQ: verbal intelligence quotient
