# Supplementary material for: Nutrition after preterm birth and adult neurocognitive outcomes
Source: PubMed Central journal article supplement (PMC5619810; doi:10.1371/journal.pone.0185632), 2017-09-28
Supplement: pone.0185632.s003.pdf [file pone.0185632.s003.pdf]

**S3 Table. Total energy intake and energy intake from human milk from birth to 3 weeks, 3 to 6 weeks, and 6 to 9 weeks of age, and adult IQ, presented separately for those with and without specific neonatal complications and illnesses, in individuals born with very low birth weight (<1500g).**

| Neonatal complications and illnesses               | N  | Total energy intake, kcal/kg/day |                  |                  | Energy from human milk, kcal/kg/day |                  |                  | IQ               |
|----------------------------------------------------|----|----------------------------------|------------------|------------------|-------------------------------------|------------------|------------------|------------------|
|                                                    |    | <i>Birth to 3 weeks</i>          | <i>3-6 weeks</i> | <i>6-9 weeks</i> | <i>Birth to 3 weeks</i>             | <i>3-6 weeks</i> | <i>6-9 weeks</i> |                  |
|                                                    |    | M (SD)                           | M (SD)           | M (SD)           | M (SD)                              | M (SD)           | M (SD)           |                  |
| Duration of ventilator treatment, <i>p</i>         |    | <i>&lt;0.001</i>                 | <i>0.18</i>      | <i>0.79</i>      | <i>&lt;0.001</i>                    | <i>0.001</i>     | <i>0.23</i>      | <i>0.13</i>      |
| None                                               | 22 | 101 (11)                         | 123 (8)          | 129 (17)         | 87 (21)                             | 118 (15)         | 116 (18)         | 105 (13)         |
| 1-7 days                                           | 24 | 101 (16)                         | 123 (11)         | 124 (9)          | 89 (18)                             | 116 (12)         | 112 (25)         | 103 (14)         |
| 8-14 days                                          | 13 | 94 (11)                          | 123 (16)         | 125 (13)         | 77 (16)                             | 105 (21)         | 102 (26)         | 107 (15)         |
| 15-28 days                                         | 8  | 84 (13)                          | 116 (16)         | 124 (15)         | 65 (28)                             | 104 (19)         | 102 (36)         | 96 (21)          |
| More than 28 days                                  | 17 | 81 (19)                          | 114 (15)         | 126 (12)         | 55 (23)                             | 94 (23)          | 101 (23)         | 95 (16)          |
| Septicemia, <i>p</i>                               |    | <i>0.23</i>                      | <i>0.61</i>      | <i>0.82</i>      | <i>0.20</i>                         | <i>0.27</i>      | <i>0.30</i>      | <i>0.12</i>      |
| No                                                 | 76 | 95 (16)                          | 121 (13)         | 126 (13)         | 79 (24)                             | 110 (19)         | 108 (25)         | 103 (15)         |
| Yes                                                | 8  | 87 (19)                          | 118 (17)         | 125 (17)         | 65 (30)                             | 102 (19)         | 117 (19)         | 93 (21)          |
| Bronchopulmonary dysplasia, <i>p</i>               |    | <i>0.001</i>                     | <i>0.29</i>      | <i>0.97</i>      | <i>&lt;0.001</i>                    | <i>&lt;0.001</i> | <i>0.37</i>      | <i>0.27</i>      |
| No                                                 | 62 | 98 (15)                          | 122 (10)         | 126 (13)         | 84 (21)                             | 115 (16)         | 110 (25)         | 103 (16)         |
| Yes                                                | 22 | 84 (18)                          | 117 (18)         | 126 (13)         | 60 (25)                             | 95 (22)          | 106 (23)         | 99 (15)          |
| Received indomethacin, <i>p</i>                    |    | <i>0.001</i>                     | <i>0.02</i>      | <i>0.53</i>      | <i>&lt;0.001</i>                    | <i>0.001</i>     | <i>0.18</i>      | <i>0.18</i>      |
| No                                                 | 55 | 99 (14)                          | 123 (12)         | 126 (14)         | 85 (21)                             | 115 (15)         | 111 (23)         | 103 (15)         |
| Yes                                                | 29 | 86 (18)                          | 116 (14)         | 124 (11)         | 64 (24)                             | 99 (22)          | 103 (26)         | 99 (16)          |
| Blood exchange transfusion, <i>p</i>               |    | <i>0.80</i>                      | <i>0.67</i>      | <i>0.57</i>      | <i>0.82</i>                         | <i>0.33</i>      | <i>0.03</i>      | <i>0.83</i>      |
| No                                                 | 70 | 94 (17)                          | 121 (13)         | 126 (13)         | 77 (25)                             | 109 (20)         | 107 (25)         | 102 (14)         |
| Yes                                                | 14 | 93 (15)                          | 119 (11)         | 124 (13)         | 79 (24)                             | 115 (17)         | 119 (10)         | 102 (20)         |
| Intraventricular hemorrhage, <sup>a</sup> <i>p</i> |    | <i>0.02</i>                      | <i>0.005</i>     | <i>0.03</i>      | <i>0.01</i>                         | <i>0.001</i>     | <i>0.40</i>      | <i>&lt;0.001</i> |
| None                                               | 50 | 96 (16)                          | 122 (11)         | 128 (14)         | 79 (25)                             | 112 (18)         | 107 (26)         | 106 (12)         |
| Grade I or II                                      | 10 | 87 (16)                          | 113 (16)         | 123 (6)          | 68 (20)                             | 93 (23)          | 108 (21)         | 92 (14)          |
| Grade III or IV                                    | 4  | 78 (9)                           | 106 (10)         | 108 (5)          | 47 (21)                             | 86 (24)          | 85 (36)          | 88 (24)          |

<sup>a</sup> Those who underwent cerebral ultrasound (n=64) did not differ from those who did not undergo ultrasound examination (n=22) in total energy intakes, energy intakes from human milk, or IQ (p-values>0.12).

Abbreviations: IQ: Full-scale intelligence quotient; g: gram; kcal: kilocalorie; M: mean (of total energy intake / energy intake from human milk / IQ score within each group); N: number of participants (in each group); *p*: p-value for difference between groups (for duration of ventilation treatment, analysis of variance was performed, and for other dichotomized complications, t-tests were performed: for these analyses, outcomes were square transformed to attain normality, however means are given as non-transformed values); SD: standard deviation.
